# Supplementary material for: Phylodynamics of Yellow Fever Virus in the Americas: new insights into the origin of the 2017 Brazilian outbreak
Source: PubMed Central journal article supplement (PMC5547128; doi:10.1038/s41598-017-07873-7), 2017-08-07
Supplement: 41598_2017_7873_MOESM1_ESM.pdf [file 41598_2017_7873_MOESM1_ESM.pdf]

# Supplementary information

## **Phylogenetics of Yellow Fever Virus in the Americas: new insights into the origin of the 2017 Brazilian outbreak**

Daiana Mir<sup>1</sup>, Edson Delatorre<sup>\*1</sup>, Myrna Bonaldo<sup>2</sup>, Ricardo Lourenço-de-Oliveira<sup>3</sup>,  
Ana Carolina Vicente<sup>4</sup> and Gonzalo Bello<sup>1</sup>

1. Laboratório de AIDS e Imunologia Molecular, Instituto Oswaldo Cruz, Fiocruz, Rio de Janeiro, Brazil.
2. Laboratório de Biologia Molecular de Flavivírus, Instituto Oswaldo Cruz, Fiocruz, Rio de Janeiro, Brazil.
3. Laboratório de Mosquitos Transmissores de Hematozoários, Instituto Oswaldo Cruz, Fiocruz, Rio de Janeiro, Brazil.
4. Laboratório de Genética Molecular de Microrganismos, Instituto Oswaldo Cruz, Fiocruz, Rio de Janeiro, Brazil.

\* Corresponding author: [edsonod@ioc.fiocruz.br/delatorre.ioc@gmail.com](mailto:edsonod@ioc.fiocruz.br/delatorre.ioc@gmail.com)

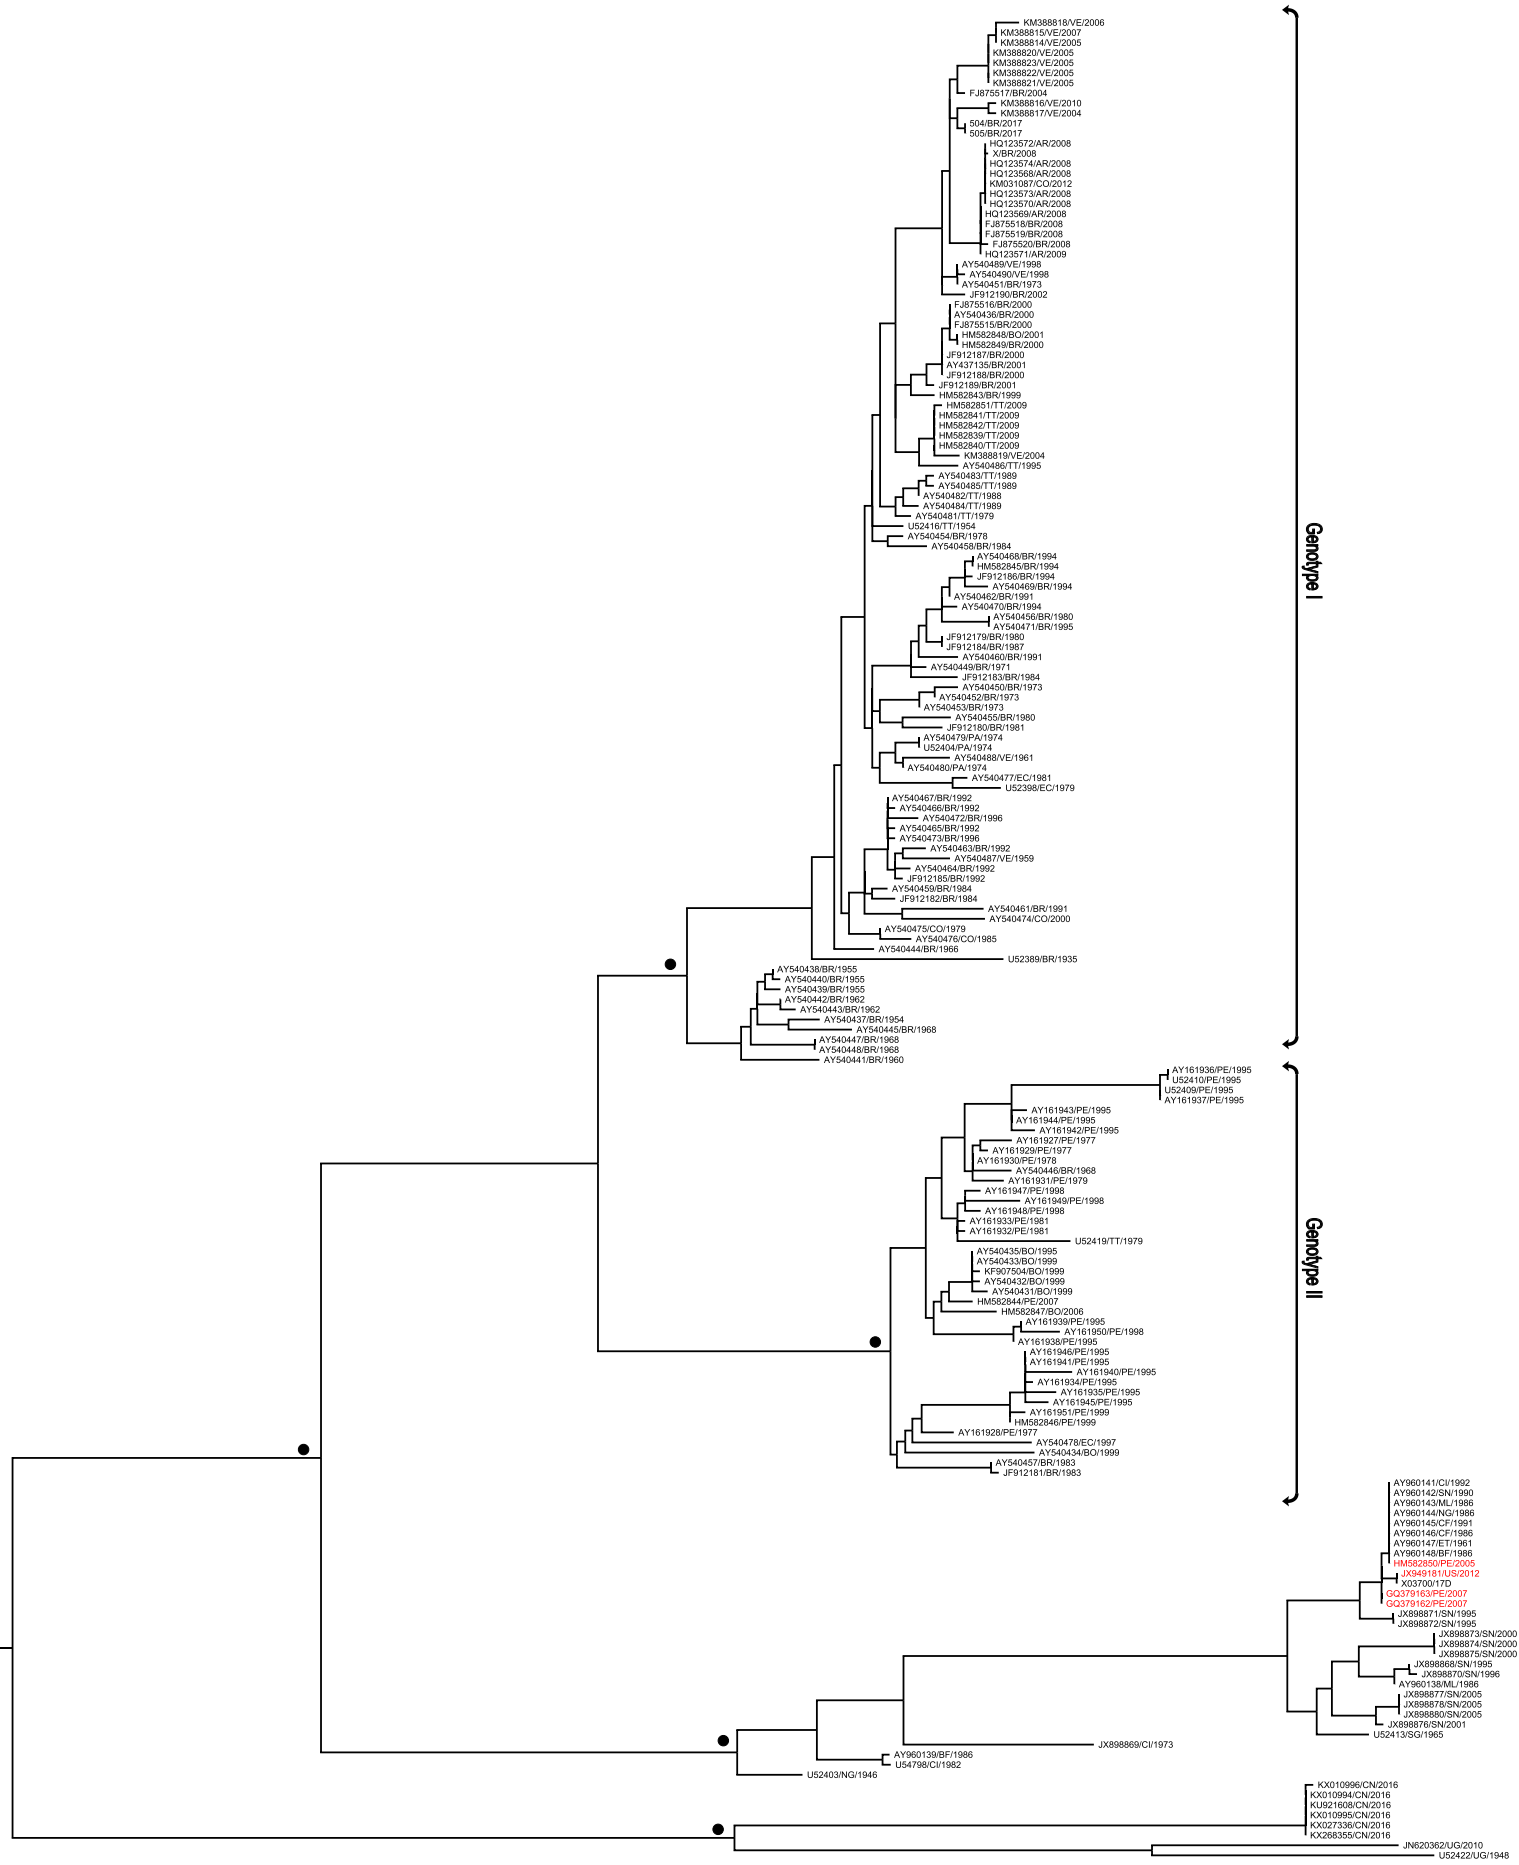

**Supplementary Figure S1. Maximum likelihood phylogeny of YFV prM/E gene sequences.** The aLRT support value of each indicated clade (dark full circle) was >0.8. American sequences that grouped with vaccine strain 17D are highlighted in red. The branch lengths are drawn to scale with bar at the bottom indicating nucleotide substitutions per site.

- LOCATIONS**
- Argentina
  - Brazil Central-West
  - Brazil North
  - Brazil Northeast
  - Brazil South
  - Brazil Southeast
  - Colombia
  - Ecuador
  - Panama
  - Trinidad and Tobago
  - Venezuela

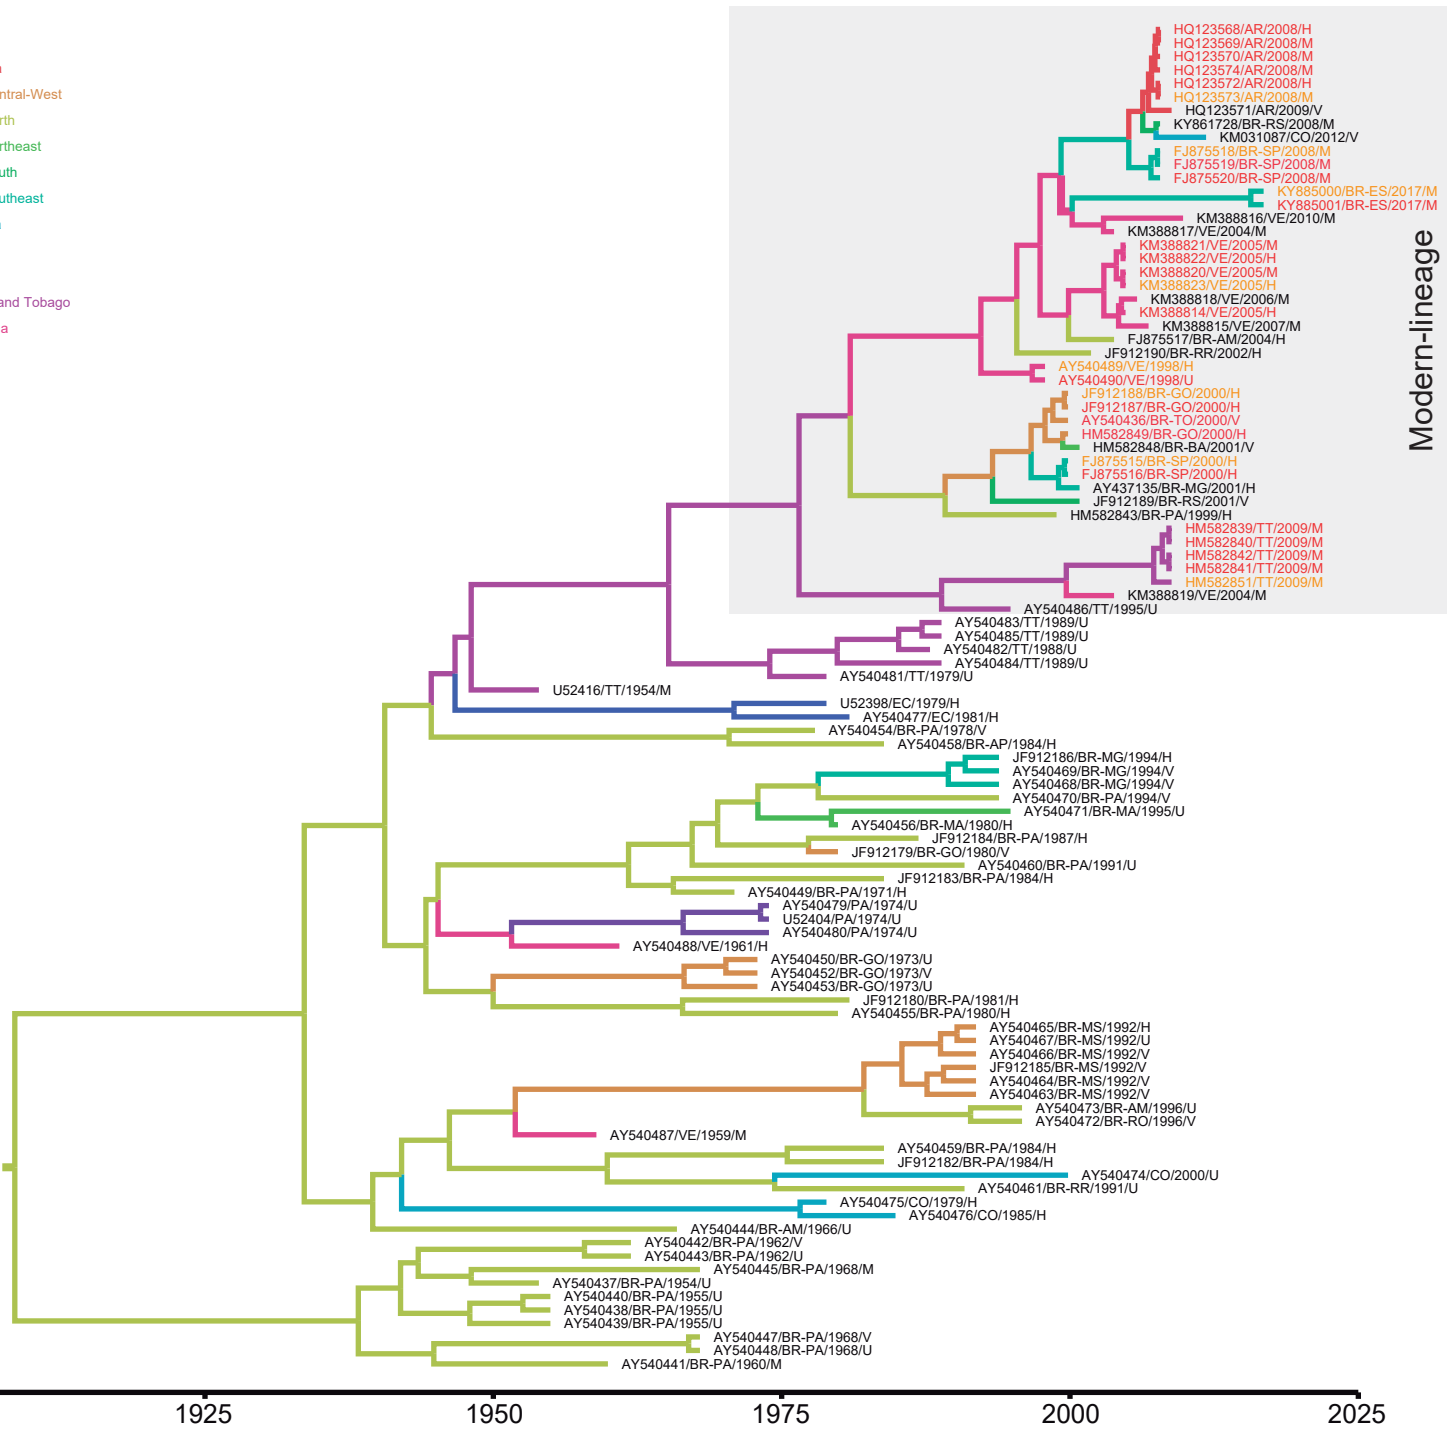

**Supplementary Figure S2. Time-scaled Bayesian MCC phylogeographic tree of the YFV genotype I prM/E gene sequences.** Branches are colored according to the most probable location state of their descendent nodes as indicated at the legend (top left). Tip labels of the modern-lineage (gray shaded area) sequences are colored indicating those epidemiologically related and sampled at the same YFV outbreak (red) and the one that was chosen as the representative of the location and year (orange). All horizontal branch lengths are drawn to a scale of years. The tree is automatically rooted under the assumption of a relaxed molecular clock.

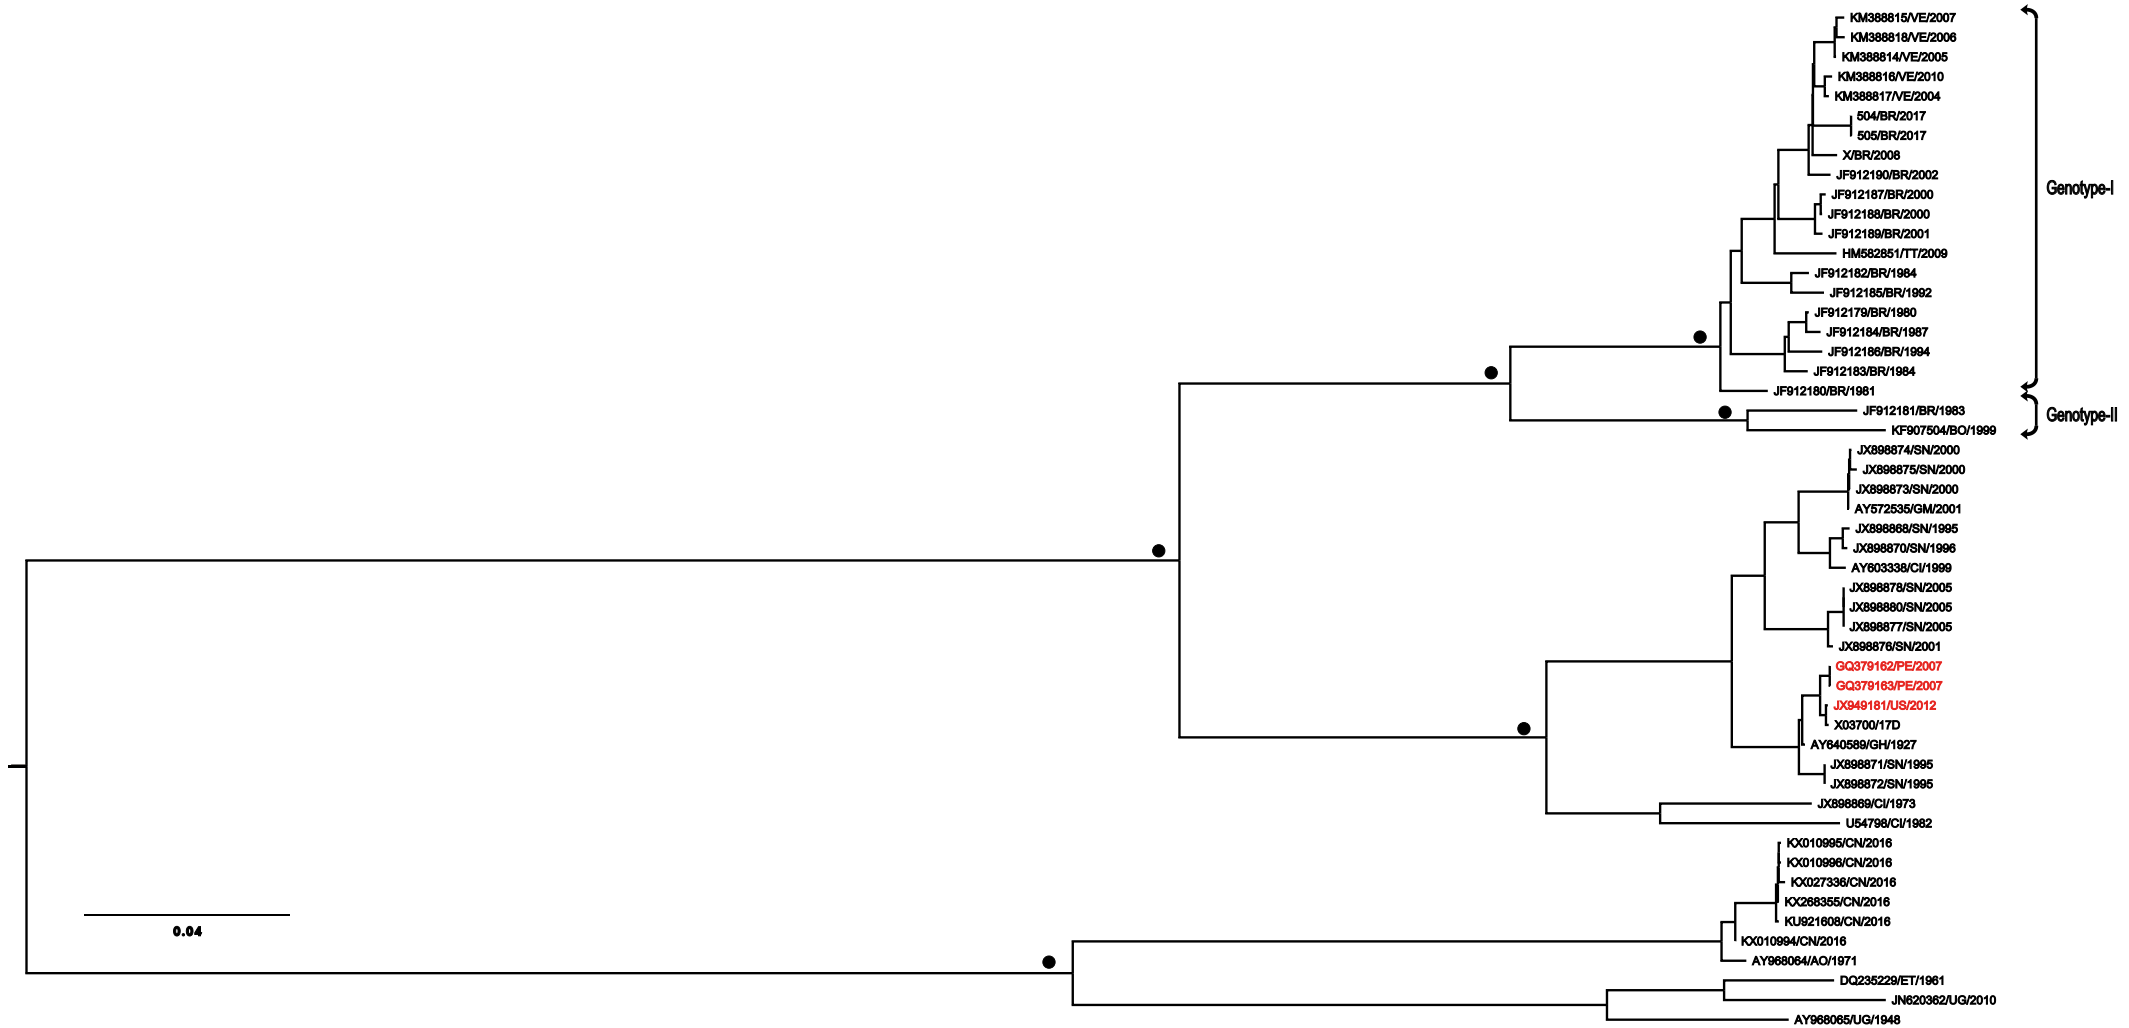

**Supplementary Figure S3. Maximum likelihood phylogeny of YFV complete coding region sequences.** The aLRT support value of each indicated clade (dark full circle) was = 1.0. American sequences that grouped with vaccine strain 17D are highlighted in red. The branch lengths are drawn to scale with bar at the bottom indicating nucleotide substitutions per site.

**Supplementary Table S1.** Best fit demographic model for YFV genotype II prM/E dataset.

| Clade   | Coalescent model | PS Log ML | Models compared       | Log BF | SS Log ML | Models compared       | Log BF |
|---------|------------------|-----------|-----------------------|--------|-----------|-----------------------|--------|
| YFV-GII | Exponential      | -2472.9   | -                     | -      | -2473.0   | -                     | -      |
|         | BSKY             | -2475.2   | Exponential/BSKY      | 2.3    | -2475.5   | Exponential/BSKY      | 2.5    |
|         | Constant         | -2480.6   | Exponential/Constant  | 7.7    | -2480.7   | Exponential/Constant  | 7.7    |
|         |                  |           | BSKY/Constant         | 5.4    |           | BSKY/Constant         | 5.2    |
|         | Expansion        | -2480.3   | Exponential/Expansion | 7.4    | -2480.5   | Exponential/Expansion | 7.5    |
|         |                  |           | BSKY/Expansion        | 5.1    |           | BSKY/Expansion        | 5.0    |
|         | Logistic         | -2481.1   | Exponential/Logistic  | 8.2    | -2481.5   | Exponential/Logistic  | 8.5    |
|         |                  |           | BSKY/Logistic         | 5.9    |           | BSKY/Logistic         | 6.0    |

Log marginal likelihood (ML) estimates for the Bayesian skyline, logistic, exponential and expansion growth demographic models obtained using the path sampling (PS) and stepping-stone sampling (SS) methods. The Log Bayes factor (BF) is the difference of the Log ML between of alternative (H1) and null (H0) models (H1/H0). Log BFs > 3 indicates that model H1 is more strongly supported by the data than model H0.

**Supplementary Table S2 - Polymorphisms found in the reconstructed ancestral YFV polyprotein open reading frame**

| Name | Type          | CDS Position | CDS Codon Number | Polymorphism Type | Mature peptide | Change | Codon position | Codon Change | AA change | Nodes |
|------|---------------|--------------|------------------|-------------------|----------------|--------|----------------|--------------|-----------|-------|
| P_1  | Synonymous    | 162          | 54               | transition        | C              | T -> C | 3              | AAT -> AAC   |           | N2    |
| P_2  | Nonsynonymous | 236          | 79               | transition        | C              | C -> T | 2              | GCT -> GTT   | A -> V    | N3    |
| P_3  | Nonsynonymous | 245          | 82               | transition        | C              | A -> G | 2              | AAG -> AGG   | K -> R    | N3    |
| P_4  | Synonymous    | 318          | 106              | transition        | aC             | G -> A | 3              | TTG -> TTA   |           | N2    |
| P_5  | Synonymous    | 324          | 108              | transition        | aC             | G -> A | 3              | GTG -> GTA   |           | N3    |
| P_6  | Synonymous    | 331          | 111              | transition        | aC             | C -> T | 1              | CTG -> TTG   |           | N3    |
| P_7  | Synonymous    | 375          | 125              | transition        | prM            | G -> A | 3              | GTG -> GTA   |           | N2    |
| P_8  | Synonymous    | 432          | 144              | transition        | prM            | T -> C | 3              | TTT -> TTC   |           | N2    |
| P_9  | Synonymous    | 447          | 149              | transition        | prM            | T -> C | 3              | GGT -> GGC   |           | N3    |
| P_10 | Synonymous    | 513          | 171              | transition        | prM            | T -> C | 3              | CCT -> CCC   |           | N3    |
| P_11 | Synonymous    | 549          | 183              | transition        | prM            | T -> C | 3              | GAT -> GAC   |           | N2    |
| P_12 | Synonymous    | 558          | 186              | transition        | prM            | T -> C | 3              | TGT -> TGC   |           | N3    |
| P_13 | Synonymous    | 693          | 231              | transition        | M              | C -> T | 3              | ACC -> ACT   |           | N2    |
| P_14 | Synonymous    | 741          | 247              | transition        | M              | A -> G | 3              | GTA -> GTG   |           | N2    |
| P_15 | Synonymous    | 753          | 251              | transition        | M              | T -> C | 3              | TTT -> TTC   |           | N3    |
| P_16 | Synonymous    | 963          | 321              | transition        | E              | T -> C | 3              | CCT -> CCC   |           | N2    |
| P_17 | Synonymous    | 978          | 326              | transition        | E              | G -> A | 3              | CTG -> CTA   |           | N2    |
| P_18 | Synonymous    | 1.020        | 340              | transition        | E              | A -> G | 3              | GAA -> GAG   |           | N3    |
| P_19 | Synonymous    | 1.056        | 352              | transition        | E              | T -> C | 3              | AAT -> AAC   |           | N3    |
| P_20 | Synonymous    | 1.131        | 377              | transition        | E              | T -> C | 3              | TGT -> TGC   |           | N2    |
| P_21 | Synonymous    | 1.146        | 382              | transition        | E              | T -> C | 3              | TCT -> TCC   |           | N3    |
| P_22 | Synonymous    | 1.174        | 392              | transition        | E              | C -> T | 1              | CTG -> TTG   |           | N3    |
| P_23 | Synonymous    | 1.221        | 407              | transition        | E              | T -> C | 3              | GCT -> GCC   |           | N3    |
| P_24 | Nonsynonymous | 1.385        | 462              | transition        | E              | A -> G | 2              | AAG -> AGG   | K -> R    | N2    |
| P_25 | Synonymous    | 1.428        | 476              | transition        | E              | C -> T | 3              | AGC -> AGT   |           | N3    |
| P_26 | Synonymous    | 1.647        | 549              | transition        | E              | T -> C | 3              | GTT -> GTC   |           | N2    |
| P_27 | Synonymous    | 1.677        | 559              | transition        | E              | C -> T | 3              | TAC -> TAT   |           | N2    |
| P_28 | Synonymous    | 1.782        | 594              | transition        | E              | T -> C | 3              | AAT -> AAC   |           | N3    |
| P_29 | Synonymous    | 1.833        | 611              | transition        | E              | G -> A | 3              | AAG -> AAA   |           | N3    |
| P_30 | Synonymous    | 1.851        | 617              | transition        | E              | C -> T | 3              | ATC -> ATT   |           | N3    |
| P_31 | Synonymous    | 1.857        | 619              | transition        | E              | G -> A | 3              | GTG -> GTA   |           | N3    |
| P_32 | Synonymous    | 1.899        | 633              | transition        | E              | T -> C | 3              | ATT -> ATC   |           | N2    |
| P_33 | Synonymous    | 1.929        | 643              | transition        | E              | T -> C | 3              | ACT -> ACC   |           | N2    |
| P_34 | Synonymous    | 1.959        | 653              | transition        | E              | C -> T | 3              | AAC -> AAT   |           | N2    |
| P_35 | Synonymous    | 1.974        | 658              | transition        | E              | C -> T | 3              | GAC -> GAT   |           | N3    |
| P_36 | Synonymous    | 1.977        | 659              | transition        | E              | C -> T | 3              | AGC -> AGT   |           | N2    |
| P_37 | Synonymous    | 1.992        | 664              | transition        | E              | A -> G | 3              | GGA -> GGG   |           | N3    |
| P_38 | Synonymous    | 2.008        | 670              | transition        | E              | T -> C | 1              | TTG -> CTG   |           | N2    |
| P_39 | Synonymous    | 2.055        | 685              | transition        | E              | C -> T | 3              | TTC -> TTT   |           | N3    |
| P_40 | Synonymous    | 2.058        | 686              | transition        | E              | C -> T | 3              | ACC -> ACT   |           | N2    |
| P_41 | Synonymous    | 2.118        | 706              | transition        | E              | C -> T | 3              | GGC -> GGT   |           | N3    |
| P_42 | Synonymous    | 2.154        | 718              | transversion      | E              | A -> C | 3              | GGA -> GGC   |           | N2    |
| P_43 | Synonymous    | 2.223        | 741              | transition        | E              | T -> C | 3              | ATT -> ATC   |           | N2    |
| P_44 | Synonymous    | 2.436        | 812              | transition        | NS1            | T -> C | 3              | TAT -> TAC   |           | N3    |
| P_45 | Synonymous    | 2.503        | 835              | transition        | NS1            | T -> C | 1              | TTG -> CTG   |           | N2    |
| P_46 | Synonymous    | 2.532        | 844              | transition        | NS1            | A -> G | 3              | GAA -> GAG   |           | N3    |
| P_47 | Synonymous    | 2.568        | 856              | transition        | NS1            | C -> T | 3              | ATC -> ATT   |           | N2    |
| P_48 | Synonymous    | 2.577        | 859              | transition        | NS1            | G -> A | 3              | GAG -> GAA   |           | N3    |
| P_49 | Synonymous    | 2.625        | 875              | transition        | NS1            | C -> T | 3              | TAC -> TAT   |           | N2    |
| P_50 | Synonymous    | 2.643        | 881              | transition        | NS1            | A -> G | 3              | CCA -> CCG   |           | N2    |
| P_51 | Synonymous    | 2.673        | 891              | transition        | NS1            | T -> C | 3              | TAT -> TAC   |           | N3    |
| P_52 | Synonymous    | 2.829        | 943              | transition        | NS1            | T -> C | 3              | ACT -> ACC   |           | N3    |
| P_53 | Synonymous    | 2.880        | 960              | transition        | NS1            | T -> C | 3              | TCT -> TCC   |           | N3    |
| P_54 | Synonymous    | 2.976        | 992              | transition        | NS1            | C -> T | 3              | CAC -> CAT   |           | N2    |
| P_55 | Synonymous    | 2.982        | 994              | transition        | NS1            | G -> A | 3              | CTG -> CTA   |           | N2    |
| P_56 | Synonymous    | 3.219        | 1.073            | transition        | NS1            | A -> G | 3              | GGA -> GGG   |           | N3    |
| P_57 | Synonymous    | 3.339        | 1.113            | transition        | NS1            | C -> T | 3              | ATC -> ATT   |           | N2    |
| P_58 | Synonymous    | 3.483        | 1.161            | transition        | NS2a           | A -> G | 3              | CTA -> CTG   |           | N2    |
| P_59 | Synonymous    | 3.486        | 1.162            | transition        | NS2a           | C -> T | 3              | GTC -> GTT   |           | N2    |
| P_60 | Synonymous    | 3.568        | 1.190            | transition        | NS2a           | T -> C | 1              | TTG -> CTG   |           | N3    |
| P_61 | Synonymous    | 3.616        | 1.206            | transition        | NS2a           | T -> C | 1              | TTG -> CTG   |           | N2    |
| P_62 | Synonymous    | 3.687        | 1.229            | transition        | NS2a           | G -> A | 3              | CGG -> CGA   |           | N3    |
| P_63 | Synonymous    | 3.696        | 1.232            | transition        | NS2a           | T -> C | 3              | CTT -> CTC   |           | N2    |
| P_64 | Synonymous    | 3.735        | 1.245            | transition        | NS2a           | A -> G | 3              | TTA -> TTG   |           | N3    |
| P_65 | Synonymous    | 3.771        | 1.257            | transition        | NS2a           | T -> C | 3              | AAT -> AAC   |           | N2    |
| P_66 | Synonymous    | 3.999        | 1.333            | transition        | NS2a           | A -> G | 3              | CTA -> CTG   |           | N2    |
| P_67 | Synonymous    | 4.008        | 1.336            | transition        | NS2a           | A -> G | 3              | ACA -> ACG   |           | N2    |
| P_68 | Synonymous    | 4.017        | 1.339            | transition        | NS2a           | T -> C | 3              | TTT -> TTC   |           | N3    |
| P_69 | Synonymous    | 4.206        | 1.402            | transition        | NS2b           | G -> A | 3              | GTG -> GTA   |           | N2    |
| P_70 | Synonymous    | 4.366        | 1.456            | transition        | NS2b           | T -> C | 1              | TTG -> CTG   |           | N3    |
| P_71 | Synonymous    | 4.392        | 1.464            | transition        | NS2b           | C -> T | 3              | CAC -> CAT   |           | N3    |
| P_72 | Synonymous    | 4.458        | 1.486            | transition        | NS3            | A -> G | 3              | GGA -> GGG   |           | N3    |
| P_73 | Synonymous    | 4.473        | 1.491            | transition        | NS3            | C -> T | 3              | GAC -> GAT   |           | N3    |
| P_74 | Synonymous    | 4.554        | 1.518            | transition        | NS3            | A -> G | 3              | GGA -> GGG   |           | N3    |
| P_75 | Synonymous    | 4.618        | 1.540            | transversion      | NS3            | A -> C | 1              | AGA -> CGA   |           | N2    |
| P_76 | Synonymous    | 4.635        | 1.545            | transition        | NS3            | C -> T | 3              | GTC -> GTT   |           | N3    |
| P_77 | Synonymous    | 4.680        | 1.560            | transition        | NS3            | G -> A | 3              | GAG -> GAA   |           | N2    |
| P_78 | Synonymous    | 4.767        | 1.589            | transition        | NS3            | G -> A | 3              | GGG -> GGA   |           | N2    |
| P_79 | Synonymous    | 4.788        | 1.596            | transition        | NS3            | G -> A | 3              | CAG -> CAA   |           | N3    |
| P_80 | Synonymous    | 4.809        | 1.603            | transition        | NS3            | A -> G | 3              | AAA -> AAG   |           | N2    |
| P_81 | Synonymous    | 4.857        | 1.619            | transition        | NS3            | C -> T | 3              | AGC -> AGT   |           | N3    |
| P_82 | Synonymous    | 4.977        | 1.659            | transition        | NS3            | A -> G | 3              | GAA -> GAG   |           | N3    |
| P_83 | Synonymous    | 5.082        | 1.694            | transition        | NS3            | C -> T | 3              | CCC -> CCT   |           | N2    |
| P_84 | Synonymous    | 5.179        | 1.727            | transition        | NS3            | C -> T | 1              | CTA -> TTA   |           | N2    |
| P_85 | Synonymous    | 5.205        | 1.735            | transition        | NS3            | C -> T | 3              | GCC -> GCT   |           | N2    |
| P_86 | Synonymous    | 5.244        | 1.748            | transition        | NS3            | C -> T | 3              | GCC -> GCT   |           | N2    |

|       |               |        |       |              |      |        |   |                |        |    |
|-------|---------------|--------|-------|--------------|------|--------|---|----------------|--------|----|
| P_87  | Synonymous    | 5.256  | 1.752 | transition   | NS3  | T -> C | 3 | GCT -> GCC     |        | N3 |
| P_88  | Synonymous    | 5.275  | 1.759 | transition   | NS3  | C -> T | 1 | CTG -> TTG     |        | N3 |
| P_89  | Synonymous    | 5.328  | 1.776 | transition   | NS3  | C -> T | 3 | CAC -> CAT     |        | N2 |
| P_90  | Synonymous    | 5.442  | 1.814 | transition   | NS3  | C -> T | 3 | TTC -> TTT     |        | N2 |
| P_91  | Synonymous    | 5.520  | 1.840 | transition   | NS3  | C -> T | 3 | ATC -> ATT     |        | N2 |
| P_92  | Synonymous    | 5.568  | 1.856 | transversion | NS3  | T -> A | 3 | GCT -> GCA     |        | N3 |
| P_93  | Synonymous    | 5.622  | 1.874 | transition   | NS3  | G -> A | 3 | CTG -> CTA     |        | N2 |
| P_94  | Synonymous    | 5.781  | 1.927 | transition   | NS3  | G -> A | 3 | AGG -> AGA     |        | N2 |
| P_95  | Synonymous    | 5.931  | 1.977 | transversion | NS3  | G -> T | 3 | CTG -> CTT     |        | N2 |
| P_96  | Synonymous    | 5.967  | 1.989 | transition   | NS3  | G -> A | 3 | AGG -> AGA     |        | N2 |
| P_97  | Synonymous    | 6.123  | 2.041 | transition   | NS3  | C -> T | 3 | GCC -> GCT     |        | N2 |
| P_98  | Synonymous    | 6.247  | 2.083 | transversion | NS3  | A -> C | 1 | AGG -> CGG     |        | N2 |
| P_99  | Synonymous    | 6.396  | 2.132 | transition   | NS4a | C -> T | 3 | GAC -> GAT     |        | N2 |
| P_100 | Nonsynonymous | 6.409  | 2.137 | transition   | NS4a | T -> C | 1 | TTC -> CTC     | F -> L | N2 |
| P_101 | Synonymous    | 6.426  | 2.142 | transition   | NS4a | G -> A | 3 | GAG -> GAA     |        | N2 |
| P_102 | Synonymous    | 6.453  | 2.151 | transition   | NS4a | A -> G | 3 | TTA -> TTG     |        | N3 |
| P_103 | Synonymous    | 6.501  | 2.167 | transition   | NS4a | T -> C | 3 | GCT -> GCC     |        | N2 |
| P_104 | Synonymous    | 6.564  | 2.188 | transition   | NS4a | C -> T | 3 | TCC -> TCT     |        | N3 |
| P_105 | Synonymous    | 6.636  | 2.212 | transition   | NS4a | C -> T | 3 | TCC -> TCT     |        | N2 |
| P_106 | Synonymous    | 6.654  | 2.218 | transition   | NS4a | T -> C | 3 | TTT -> TTC     |        | N2 |
| P_107 | Synonymous    | 6.813  | 2.271 | transition   | NS4b | G -> A | 3 | GGG -> GGA     |        | N3 |
| P_108 | Synonymous    | 6.861  | 2.287 | transition   | NS4b | C -> T | 3 | GAC -> GAT     |        | N3 |
| P_109 | Synonymous    | 6.957  | 2.319 | transition   | NS4b | C -> T | 3 | GGC -> GGT     |        | N2 |
| P_110 | Synonymous    | 7.026  | 2.342 | transition   | NS4b | C -> T | 3 | TTC -> TTT     |        | N2 |
| P_111 | Synonymous    | 7.143  | 2.381 | transition   | NS4b | T -> C | 3 | CCT -> CCC     |        | N2 |
| P_112 | Synonymous    | 7.149  | 2.383 | transversion | NS4b | T -> A | 3 | ATT -> ATA     |        | N3 |
| P_113 | Synonymous    | 7.233  | 2.411 | transition   | NS4b | T -> C | 3 | GTT -> GTC     |        | N3 |
| P_114 | Synonymous    | 7.383  | 2.461 | transition   | NS4b | G -> A | 3 | GGG -> GGA     |        | N3 |
| P_115 | Synonymous    | 7.392  | 2.464 | transversion | NS4b | A -> C | 3 | ATA -> ATC     |        | N3 |
| P_116 | Synonymous    | 7.401  | 2.467 | transition   | NS4b | C -> T | 3 | AAC -> AAT     |        | N2 |
| P_117 | Synonymous    | 7.539  | 2.513 | transition   | NS5  | T -> C | 3 | ACT -> ACC     |        | N2 |
| P_118 | Synonymous    | 7.540  | 2.514 | transition   | NS5  | T -> C | 1 | TTG -> CTG     |        | N3 |
| P_119 | Synonymous    | 7.650  | 2.550 | transition   | NS5  | A -> G | 3 | CTA -> CTG     |        | N3 |
| P_120 | Synonymous    | 7.662  | 2.554 | transition   | NS5  | G -> A | 3 | AAG -> AAA     |        | N2 |
| P_121 | Synonymous    | 7.680  | 2.560 | transition   | NS5  | T -> C | 3 | GCT -> GCC     |        | N2 |
| P_122 | Synonymous    | 7.731  | 2.577 | transition   | NS5  | T -> C | 3 | GTT -> GTC     |        | N2 |
| P_123 | Synonymous    | 7.735  | 2.579 | transition   | NS5  | C -> T | 1 | CTG -> TTG     |        | N3 |
| P_124 | Synonymous    | 7.869  | 2.623 | transition   | NS5  | A -> G | 3 | CAA -> CAG     |        | N3 |
| P_125 | Synonymous    | 7.893  | 2.631 | transition   | NS5  | T -> C | 3 | ACT -> ACC     |        | N3 |
| P_126 | Synonymous    | 7.902  | 2.634 | transition   | NS5  | T -> C | 3 | GAT -> GAC     |        | N3 |
| P_127 | Synonymous    | 7.941  | 2.647 | transition   | NS5  | C -> T | 3 | GAC -> GAT     |        | N2 |
| P_128 | Synonymous    | 7.971  | 2.657 | transition   | NS5  | T -> C | 3 | TCT -> TCC     |        | N3 |
| P_129 | Synonymous    | 7.998  | 2.666 | transition   | NS5  | G -> A | 3 | AGG -> AGA     |        | N2 |
| P_130 | Synonymous    | 8.085  | 2.695 | transversion | NS5  | A -> T | 3 | CCA -> CCT     |        | N3 |
| P_131 | Synonymous    | 8.136  | 2.712 | transversion | NS5  | T -> A | 3 | GTT -> GTA     |        | N2 |
| P_132 | Synonymous    | 8.148  | 2.716 | transition   | NS5  | T -> C | 3 | CCT -> CCC     |        | N2 |
| P_133 | Synonymous    | 8.163  | 2.721 | transversion | NS5  | T -> A | 3 | TCT -> TCA     |        | N2 |
| P_134 | Synonymous    | 8.187  | 2.729 | transition   | NS5  | A -> G | 3 | TCA -> TCG     |        | N3 |
| P_135 | Synonymous    | 8.199  | 2.733 | transition   | NS5  | C -> T | 3 | AGC -> AGT     |        | N2 |
| P_136 | Nonsynonymous | 8.206  | 2.736 | transition   | NS5  | G -> A | 1 | GCG -> ACG     | A -> T | N3 |
| P_137 | Synonymous    | 8.469  | 2.823 | transition   | NS5  | C -> T | 3 | AGC -> AGT     |        | N3 |
| P_138 | Synonymous    | 8.499  | 2.833 | transition   | NS5  | A -> G | 3 | AAA -> AAG     |        | N3 |
| P_139 | Synonymous    | 8.674  | 2.892 | transition   | NS5  | T -> C | 1 | TTG -> CTG     |        | N2 |
| P_140 | Synonymous    | 8.811  | 2.937 | transition   | NS5  | A -> G | 3 | AAA -> AAG     |        | N2 |
| P_141 | Synonymous    | 8.904  | 2.968 | transition   | NS5  | A -> G | 3 | AAA -> AAG     |        | N3 |
| P_142 | Synonymous    | 8.934  | 2.978 | transition   | NS5  | T -> C | 3 | AGT -> AGC     |        | N2 |
| P_143 | Synonymous    | 8.964  | 2.988 | transition   | NS5  | C -> T | 3 | GCC -> GCT     |        | N2 |
| P_144 | Synonymous    | 8.994  | 2.998 | transition   | NS5  | T -> C | 3 | TTT -> TTC     |        | N2 |
| P_145 | Synonymous    | 9.195  | 3.065 | transition   | NS5  | T -> C | 3 | AGT -> AGC     |        | N2 |
| P_146 | Synonymous    | 9.211  | 3.071 | transition   | NS5  | C -> T | 1 | CTA -> TTA/TTG |        | N2 |
| P_147 | Synonymous    | 9.213  | 3.071 | transition   | NS5  | A -> G | 3 | TTA -> TTG     |        | N3 |
| P_148 | Synonymous    | 9.246  | 3.082 | transition   | NS5  | T -> C | 3 | AAT -> AAC     |        | N2 |
| P_149 | Synonymous    | 9.342  | 3.114 | transition   | NS5  | C -> T | 3 | ACC -> ACT     |        | N2 |
| P_150 | Synonymous    | 9.375  | 3.125 | transition   | NS5  | C -> T | 3 | GTC -> GTT     |        | N2 |
| P_151 | Synonymous    | 9.384  | 3.128 | transition   | NS5  | C -> T | 3 | ATC -> ATT     |        | N3 |
| P_152 | Synonymous    | 9.456  | 3.152 | transition   | NS5  | A -> G | 3 | AAA -> AAG     |        | N2 |
| P_153 | Synonymous    | 9.495  | 3.165 | transversion | NS5  | G -> C | 3 | CTG -> CTC     |        | N2 |
| P_154 | Synonymous    | 9.576  | 3.192 | transition   | NS5  | C -> T | 3 | AAC -> AAT     |        | N2 |
| P_155 | Synonymous    | 9.597  | 3.199 | transition   | NS5  | G -> A | 3 | AAG -> AAA     |        | N3 |
| P_156 | Synonymous    | 9.648  | 3.216 | transition   | NS5  | A -> G | 3 | GTA -> GTG     |        | N2 |
| P_157 | Synonymous    | 9.651  | 3.217 | transition   | NS5  | T -> C | 3 | CCT -> CCC     |        | N2 |
| P_158 | Synonymous    | 9.744  | 3.248 | transition   | NS5  | A -> G | 3 | GGA -> GGG     |        | N2 |
| P_159 | Synonymous    | 9.765  | 3.255 | transition   | NS5  | C -> T | 3 | GGC -> GGT     |        | N2 |
| P_160 | Synonymous    | 9.930  | 3.310 | transition   | NS5  | A -> G | 3 | AAA -> AAG     |        | N3 |
| P_161 | Synonymous    | 9.954  | 3.318 | transition   | NS5  | T -> C | 3 | GAT -> GAC     |        | N2 |
| P_162 | Nonsynonymous | 10.022 | 3.341 | transition   | NS5  | G -> A | 2 | AGG -> AAG     | R -> K | N2 |
| P_163 | Synonymous    | 10.176 | 3.392 | transition   | NS5  | T -> C | 3 | TAT -> TAC     |        | N3 |

**Supplementary Table S3 - Amino acid mutations with respect to ancestor N3 found in the modern subclade 1E sequences**

| Name | Type          | CDS Position | CDS Codon Number | Polymorphism Type | Mature peptide | Change     | Codon position | Codon Change | Amino Acid Change | Variant Sequences (Accession number) |
|------|---------------|--------------|------------------|-------------------|----------------|------------|----------------|--------------|-------------------|--------------------------------------|
| M_1  | Nonsynonymous | 322          | 108              | transition        | aC             | G -> A     | 1              | GTA -> ATA   | V -> I            | KY885000; KY885001                   |
| M_2  | Nonsynonymous | 356          | 119              | transition        | aC             | T -> C     | 2              | GTT -> GCT   | V -> A            | KM388817                             |
| M_3  | Nonsynonymous | 772          | 258              | transition        | M              | G -> A     | 1              | GCC -> ACC   | A -> T            | KM388817                             |
| M_4  | Nonsynonymous | 3185         | 1062             | transition        | NS1            | G -> A     | 2              | AGT -> AAT   | S -> N            | KY861728                             |
| M_5  | Nonsynonymous | 3191         | 1064             | transition        | NS1            | T -> C     | 2              | GTT -> GCT   | V -> A            | KM388817                             |
| M_6  | Nonsynonymous | 3328         | 1110             | transition        | NS1            | C -> T     | 1              | CCT -> TCT   | P -> S            | KY861728                             |
| M_7  | Nonsynonymous | 3397         | 1133             | transition        | NS2a           | A -> G     | 1              | ATC -> GTC   | I -> V            | JF912190                             |
| M_8  | Nonsynonymous | 3448         | 1150             | transition        | NS2a           | G -> A     | 1              | GTA -> ATA   | V -> I            | KM388814; KM388815; KM388818         |
| M_9  | Nonsynonymous | 3532         | 1178             | transition        | NS2a           | A -> G     | 1              | ATC -> GTC   | I -> V            | JF912190                             |
| M_10 | Nonsynonymous | 3554         | 1185             | transition        | NS2a           | C -> T     | 2              | ACA -> ATA   | T -> I            | KM388815                             |
| M_11 | Nonsynonymous | 3590         | 1197             | transition        | NS2a           | A -> G     | 2              | AAT -> AGT   | N -> S            | KM388815                             |
| M_12 | Nonsynonymous | 3937         | 1313             | transversion      | NS2a           | T -> A     | 1              | TCA -> ACA   | S -> T            | KM388814; KM388815; KM388818         |
| M_13 | Nonsynonymous | 4444         | 1482             | transition        | NS2b           | G -> A     | 1              | GCC -> ACC   | A -> T            | KM388814; KM388815; KM388818         |
| M_14 | Nonsynonymous | 4716         | 1572             | transversion      | NS3            | G -> T     | 3              | GAG -> GAT   | E -> D            | KY885000; KY885001                   |
| M_15 | Nonsynonymous | 4773         | 1591             | transversion      | NS3            | C -> A     | 3              | AAC -> AAA   | N -> K            | KM388818                             |
| M_16 | Nonsynonymous | 4814         | 1605             | transition        | NS3            | G -> A     | 2              | AGG -> AAG   | R -> K            | KY885000; KY885001                   |
| M_17 | Nonsynonymous | 4997         | 1666             | transition        | NS3            | A -> G     | 2              | CAG -> CGG   | Q -> R            | KY861728                             |
| M_18 | Nonsynonymous | 5035         | 1679             | transition        | NS3            | A -> G     | 1              | ATT -> GTT   | I -> V            | KM388815                             |
| M_19 | Nonsynonymous | 5432         | 1811             | transition        | NS3            | G -> A     | 2              | AGT -> AAT   | S -> N            | JF912190                             |
| M_20 | Nonsynonymous | 5504         | 1835             | transversion      | NS3            | C -> A     | 2              | ACA -> AAA   | T -> K            | KM388818                             |
| M_21 | Nonsynonymous | 6932         | 2311             | transversion      | NS4b           | A -> T     | 2              | CAC -> CTC   | H -> L            | KM388818                             |
| M_22 | Nonsynonymous | 7223         | 2408             | transition        | NS4b           | A -> G     | 2              | AAT -> AGT   | N -> S            | KM388815; KM388818                   |
| M_23 | Nonsynonymous | 7506         | 2502             | transversion      | NS4b           | G -> T     | 3              | AAG -> AAT   | K -> N            | KM388818                             |
| M_24 | Nonsynonymous | 7508         | 2503             | transition        | NS4b           | C -> T     | 2              | ACT -> ATT   | T -> I            | KM388814                             |
| M_25 | Nonsynonymous | 7802         | 2601             | transition        | NS5            | G -> A     | 2              | AGA -> AAA   | R -> K            | KY861728                             |
| M_26 | Nonsynonymous | 7820         | 2607             | transition        | NS5            | A -> G     | 2              | AAG -> AGG   | K -> R            | KY885000; KY885001                   |
| M_27 | Nonsynonymous | 7840         | 2614             | transition        | NS5            | G -> A     | 1              | GAA -> AAA   | E -> K            | KM388817                             |
| M_28 | Nonsynonymous | 7930         | 2644             | substitution      | NS5            | GTG -> ATA | 1              | GTG -> ATA   | V -> I            | KY885000; KY885001                   |
| M_29 | Nonsynonymous | 8035         | 2679             | transition        | NS5            | G -> A     | 1              | GGC -> AGC   | G -> S            | KY885000; KY885001                   |
| M_30 | Nonsynonymous | 8408         | 2803             | transition        | NS5            | A -> G     | 2              | AAT -> AGT   | N -> S            | KY885000; KY885001; KM388818         |
| M_31 | Nonsynonymous | 9091         | 3031             | transition        | NS5            | G -> A     | 1              | GCA -> ACA   | A -> T            | KM388816                             |
| M_32 | Nonsynonymous | 9446         | 3149             | transition        | NS5            | T -> C     | 2              | GTT -> GCT   | V -> A            | KY885000; KY885001                   |
| M_33 | Nonsynonymous | 9472         | 3158             | transition        | NS5            | G -> A     | 1              | GCT -> ACT   | A -> T            | KM388816                             |
| M_34 | Nonsynonymous | 9644         | 3215             | transition        | NS5            | A -> G     | 2              | AAT -> AGT   | N -> S            | KY885000; KY885001                   |
| M_35 | Nonsynonymous | 10033        | 3345             | transition        | NS5            | G -> A     | 1              | GAC -> AAC   | D -> N            | KY861728                             |



**Supplementary Table S4** - List of the GenBank accession numbers of the YFV sequences used in this study

| Country   | Region | Genbank accession number | Collection date |
|-----------|--------|--------------------------|-----------------|
| Argentina | -      | HQ123568                 | 2008            |
|           | -      | HQ123569                 | 2008            |
|           | -      | HQ123570                 | 2008            |
|           | -      | HQ123572                 | 2008            |
|           | -      | HQ123573                 | 2008            |
|           | -      | HQ123574                 | 2008            |
|           | -      | HQ123571                 | 2009            |
| Bolivia   | -      | AY540435                 | 1995            |
|           | -      | AY540431                 | 1999            |
|           | -      | AY540432                 | 1999            |
|           | -      | AY540433                 | 1999            |
|           | -      | AY540434                 | 1999            |
|           | -      | KF907504                 | 1999            |
|           | -      | HM582847                 | 2006            |
| Brazil    | BR-AM  | AY540444                 | 1966            |
|           |        | AY540473                 | 1996            |
|           |        | FJ875517                 | 2004            |
|           | BR-AP  | AY540458                 | 1984            |
|           | BR-BA  | HM582848                 | 2001            |
|           | BR-ES  | KY885000                 | 2017            |
|           |        | KY885001                 | 2017            |
|           | BR-GO  | AY540450                 | 1973            |
|           |        | AY540452                 | 1973            |
|           |        | AY540453                 | 1973            |
|           |        | JF912179                 | 1980            |
|           |        | HM582849                 | 2000            |
|           |        | JF912187                 | 2000            |
|           |        | JF912188                 | 2000            |
|           | BR-MA  | AY540456                 | 1980            |
|           |        | AY540471                 | 1995            |
|           | BR-MG  | AY540468                 | 1994            |
|           |        | AY540469                 | 1994            |
|           |        | JF912186                 | 1994            |
|           |        | AY437135                 | 2001            |
|           | BR-MS  | AY540463                 | 1992            |
|           |        | AY540464                 | 1992            |
|           |        | AY540465                 | 1992            |
|           |        | AY540466                 | 1992            |
|           |        | AY540467                 | 1992            |
|           |        | JF912185                 | 1992            |
|           | BR-PA  | AY540437                 | 1954            |
| AY540438  |        | 1955                     |                 |
| AY540439  |        | 1955                     |                 |
| AY540440  |        | 1955                     |                 |
| AY540441  |        | 1960                     |                 |

|          |       |          |      |
|----------|-------|----------|------|
|          |       | AY540442 | 1962 |
|          |       | AY540443 | 1962 |
|          |       | AY540445 | 1968 |
|          |       | AY540446 | 1968 |
|          |       | AY540447 | 1968 |
|          |       | AY540448 | 1968 |
|          |       | AY540449 | 1971 |
|          |       | AY540454 | 1978 |
|          |       | AY540455 | 1980 |
|          |       | JF912180 | 1981 |
|          |       | AY540459 | 1984 |
|          |       | JF912182 | 1984 |
|          |       | JF912183 | 1984 |
|          |       | JF912184 | 1987 |
|          |       | AY540460 | 1991 |
|          |       | AY540470 | 1994 |
|          |       | HM582843 | 1999 |
|          | BR-RO | AY540457 | 1983 |
|          |       | JF912181 | 1983 |
|          |       | AY540472 | 1996 |
|          | BR-RR | AY540461 | 1991 |
|          |       | JF912190 | 2002 |
|          | BR-RS | JF912189 | 2001 |
|          |       | KY861728 | 2008 |
|          | BR-SP | FJ875515 | 2000 |
|          |       | FJ875516 | 2000 |
|          |       | FJ875518 | 2008 |
|          |       | FJ875519 | 2008 |
|          |       | FJ875520 | 2008 |
|          | BR-TO | AY540436 | 2000 |
| Colombia | -     | AY540475 | 1979 |
|          | -     | AY540476 | 1985 |
|          | -     | AY540474 | 2000 |
|          | -     | KM031087 | 2012 |
| Ecuador  | -     | U52398   | 1979 |
|          | -     | AY540477 | 1981 |
|          | -     | AY540478 | 1997 |
| Panama   | -     | AY540479 | 1974 |
|          | -     | AY540480 | 1974 |
|          | -     | U52404   | 1974 |
| Peru     | -     | AY161927 | 1977 |
|          | -     | AY161928 | 1977 |
|          | -     | AY161929 | 1977 |
|          | -     | AY161930 | 1978 |
|          | -     | AY161931 | 1979 |
|          | -     | AY161932 | 1981 |
|          | -     | AY161933 | 1981 |
|          | -     | AY161934 | 1995 |
|          | -     | AY161935 | 1995 |
|          | -     | AY161938 | 1995 |

|                     |          |          |      |
|---------------------|----------|----------|------|
|                     | -        | AY161939 | 1995 |
|                     | -        | AY161940 | 1995 |
|                     | -        | AY161941 | 1995 |
|                     | -        | AY161942 | 1995 |
|                     | -        | AY161943 | 1995 |
|                     | -        | AY161944 | 1995 |
|                     | -        | AY161945 | 1995 |
|                     | -        | AY161946 | 1995 |
|                     | -        | AY161947 | 1998 |
|                     | -        | AY161948 | 1998 |
|                     | -        | AY161949 | 1998 |
|                     | -        | AY161950 | 1998 |
|                     | -        | AY161951 | 1999 |
|                     | -        | HM582846 | 1999 |
|                     | -        | HM582844 | 2007 |
| Trinidad and Tobago | -        | U52416   | 1954 |
|                     | -        | AY540481 | 1979 |
|                     | -        | U52419   | 1979 |
|                     | -        | AY540482 | 1988 |
|                     | -        | AY540483 | 1989 |
|                     | -        | AY540484 | 1989 |
|                     | -        | AY540485 | 1989 |
|                     | -        | AY540486 | 1995 |
|                     | -        | HM582839 | 2009 |
|                     | -        | HM582840 | 2009 |
|                     | -        | HM582841 | 2009 |
| Venezuela           | -        | AY540487 | 1959 |
|                     | -        | AY540488 | 1961 |
|                     | -        | AY540489 | 1998 |
|                     | -        | AY540490 | 1998 |
|                     | -        | KM388817 | 2004 |
|                     | -        | KM388819 | 2004 |
|                     | -        | KM388814 | 2005 |
|                     | -        | KM388820 | 2005 |
|                     | -        | KM388821 | 2005 |
|                     | -        | KM388822 | 2005 |
|                     | -        | KM388823 | 2005 |
|                     | -        | KM388818 | 2006 |
|                     | -        | KM388815 | 2007 |
| -                   | KM388816 | 2010     |      |
